# Supplementary material for: Silica-coated bismuth sulfide nanorods as multimodal contrast agents for a non-invasive visualization of the gastrointestinal tract
Source: Royal Society of Chemistry journal article supplement (doi:10.1039/c5nr03068d), 2015-01-01
Supplement: c5nr03068d1.pdf [file c5nr03068d1.pdf]

## Supplementary Information

### **Silica-coated bismuth sulfide nanorods as multimodal contrast agents for non-invasive visualization of gastrointestinal tract**

*Xiaopeng Zheng,<sup>1,2,§</sup> Junxin Shi,<sup>1,3,§</sup> Yang Bu<sup>2</sup>, Gan Tian,<sup>1</sup> Xiao Zhang,<sup>1</sup> Wenyan Yin,<sup>1</sup> Bifen Gao,<sup>3</sup> Zhiyong Yang,<sup>2</sup> Zhongbo Hu,<sup>2</sup> Xiangfeng Liu,<sup>2</sup> Liang Yan,<sup>1,\*</sup> Zhanjun Gu,<sup>1,\*</sup> and Yuliang Zhao<sup>1,\*</sup>*

<sup>1</sup>CAS Key Laboratory for Biomedical Effects of Nanomaterials and Nanosafety, Institute of High Energy Physics, Chinese Academy of Sciences, Beijing 100049, P. R. China

<sup>2</sup>College of Materials Science and Optoelectronic Technology, University of Chinese Academy of Sciences, Beijing 100049, P. R. China

<sup>3</sup>Department of Applied Chemistry, College of Materials Science & Engineering, Huaqiao University, Xiamen 361021, P. R. China

<sup>§</sup>These authors contributed equally.

Corresponding author:    yanliang@ihep.ac.cn,    zjgu@ihep.ac.cn,    and  
zhaoyuliang@ihep.ac.cn

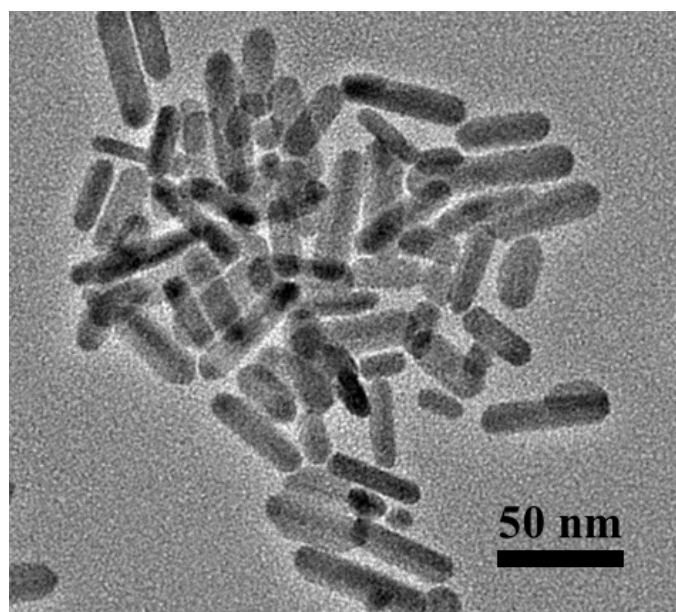

**Figure S1.** TEM image of as-prepared Bi<sub>2</sub>S<sub>3</sub> NRs.

**Figure S2.** (A) Wide-angle XRD pattern of the as-prepared  $\text{Bi}_2\text{S}_3$  NRs. Bottom in (A): the standard pattern of pure hexagonal  $\text{Bi}_2\text{S}_3$  (JCPDS No: 43-1471). (B) XPS spectrum of as-prepared  $\text{Bi}_2\text{S}_3$  NRs. (C) Bi 4f XPS spectrum of as-prepared  $\text{Bi}_2\text{S}_3$  NRs. (D) FT-IR spectra of  $\text{Bi}_2\text{S}_3$  NRs before and after modification with TPGS.

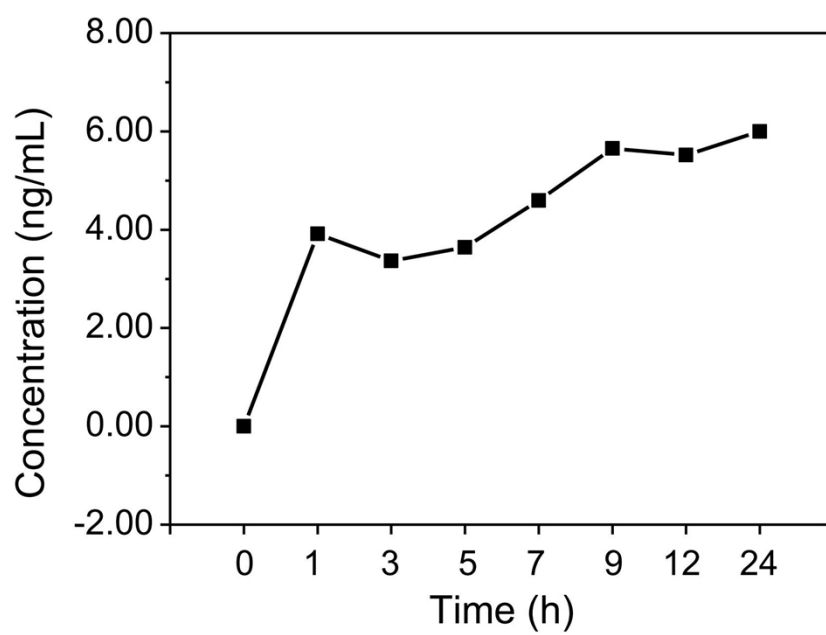

**Figure S3.** Cumulative bismuth ion concentration released from  $\text{Bi}_2\text{S}_3@\text{SiO}_2$  NRs.

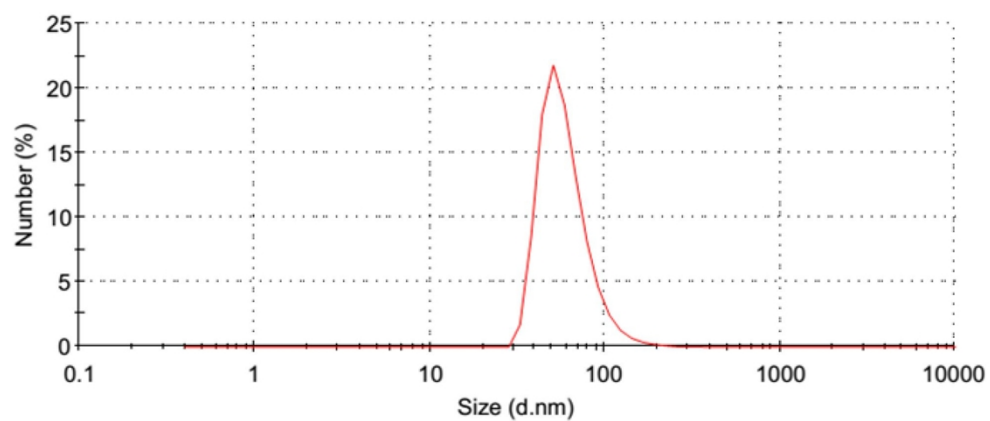

**Figure S4.** Dynamic light scattering figure of  $\text{Bi}_2\text{S}_3@\text{SiO}_2$  NRs.

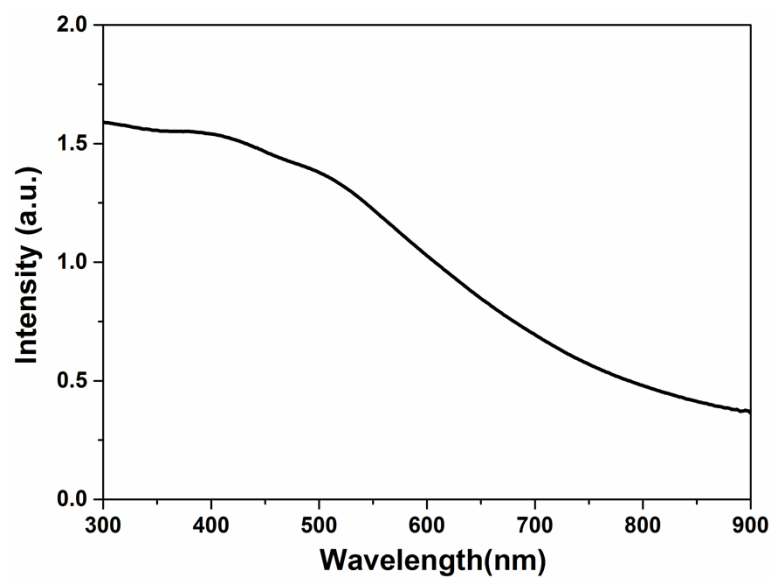

**Figure S5.** UV-vis-NIR absorbance spectrum of Bi<sub>2</sub>S<sub>3</sub>@SiO<sub>2</sub> NRs.

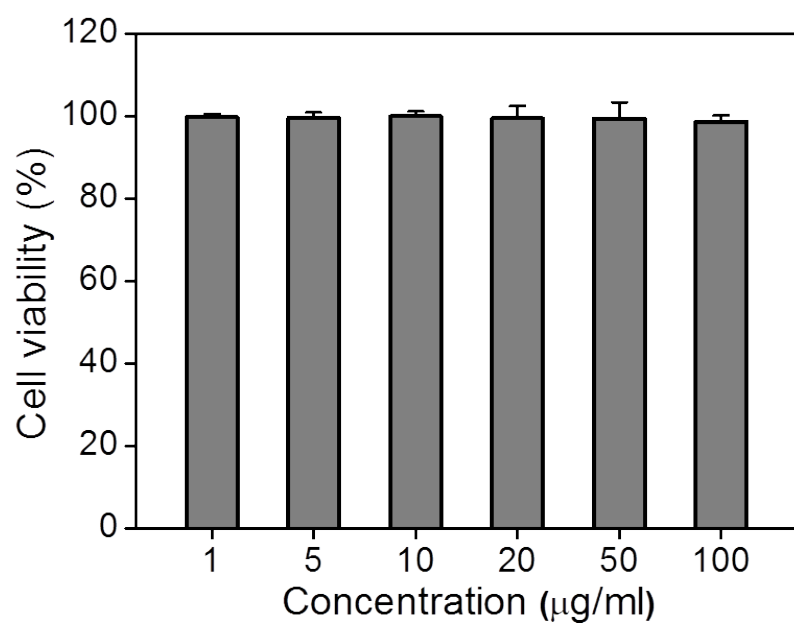

**Figure S6.** Cell viability of 16HBE cells after cultured with various concentrations of  $\text{Bi}_2\text{S}_3@\text{SiO}_2$  NRs for 24 h.

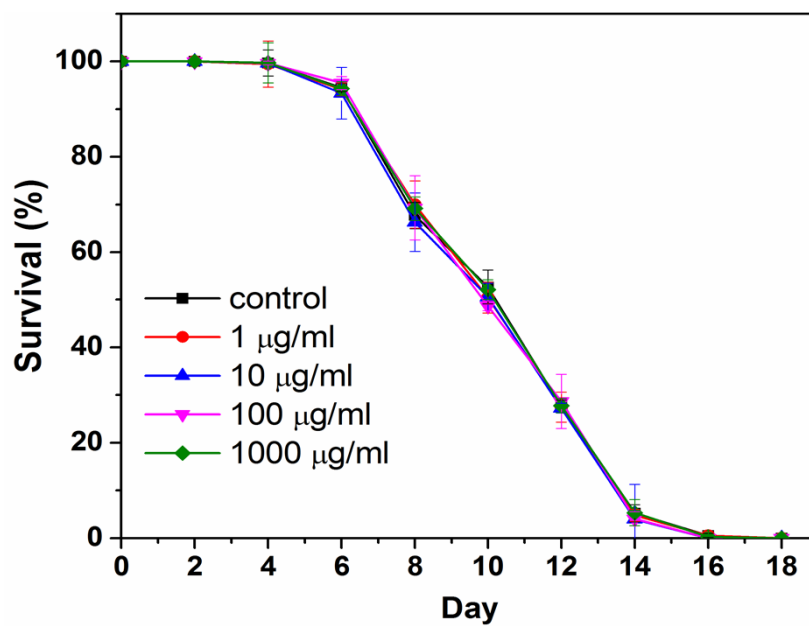

**Figure S7.** The lifespan curves of worms treated with FUDR-containing plates with different concentrations of  $\text{Bi}_2\text{S}_3@\text{SiO}_2$  NRs.



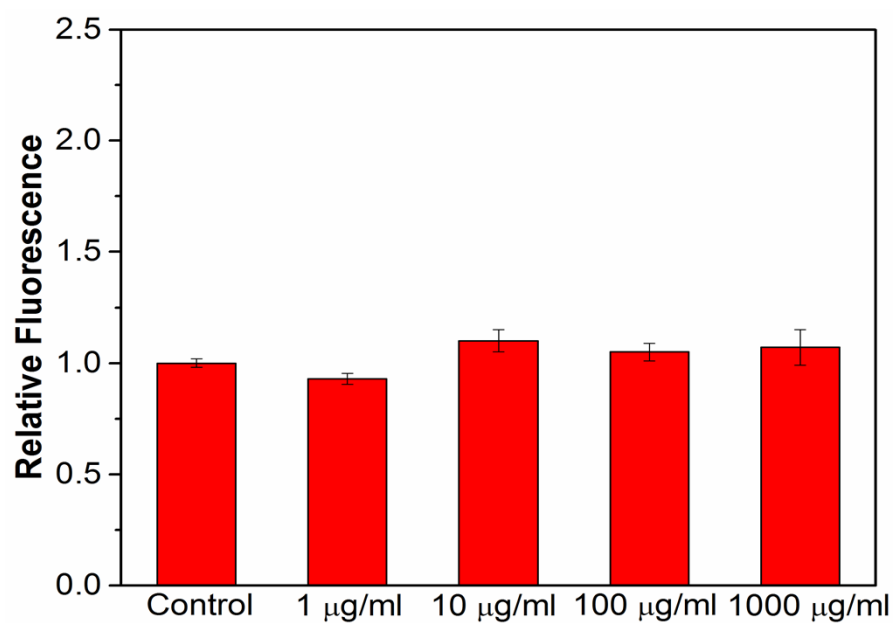

**Figure S8.** Effects of  $\text{Bi}_2\text{S}_3@\text{SiO}_2$  NRs treatments on the accumulation of lipofuscin in age-synchronized worms. The intensity of fluorescence of the worms treated with different concentrations of  $\text{Bi}_2\text{S}_3@\text{SiO}_2$  NRs relative to the control group.

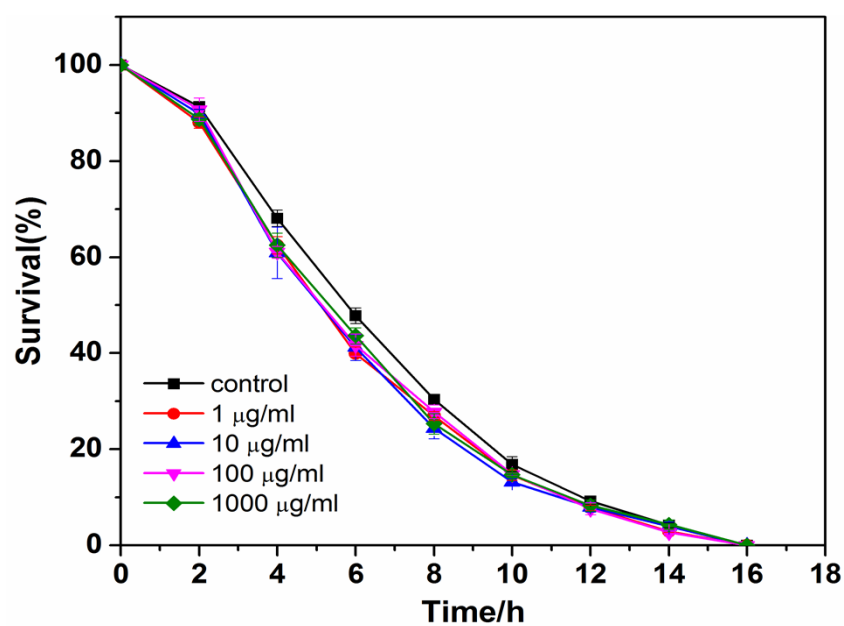

**Figure S9.** Effects of  $\text{Bi}_2\text{S}_3@\text{SiO}_2$  NRs on juglone-induced oxidative stress. The lifespan curves of 3-day old worms were pretreated with NGM plates with  $\text{Bi}_2\text{S}_3@\text{SiO}_2$  NRs and then incubated with 600  $\mu\text{M}$  juglone at 20 °C.

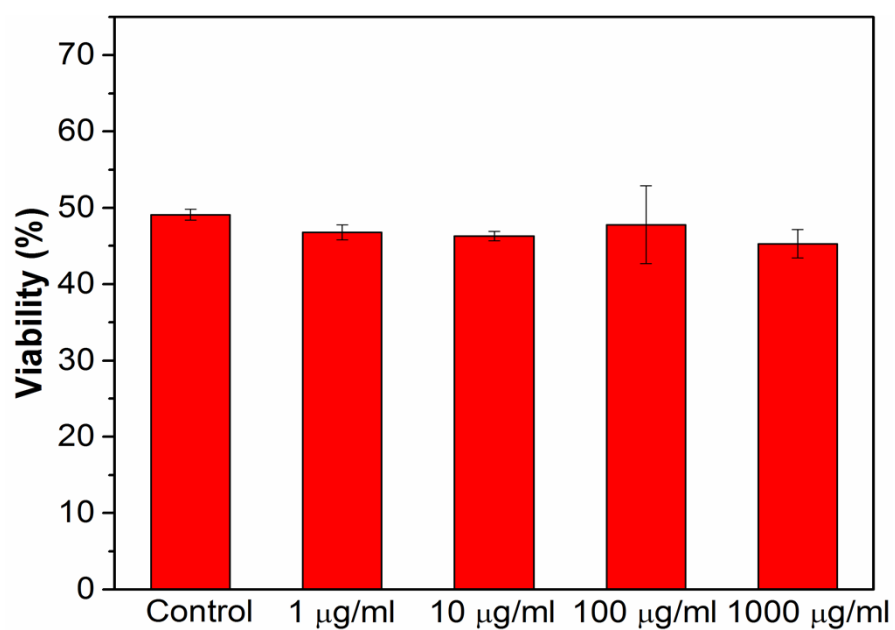

**Figure S10.** Effects of  $\text{Bi}_2\text{S}_3@\text{SiO}_2$  NRs treatments on thermotolerance. The viability of 3-day old worms treated with different concentrations of  $\text{Bi}_2\text{S}_3@\text{SiO}_2$  NRs and exposed to 35 °C for 10 h. The above experiments was repeated at least 3 times, data are expressed mean  $\pm$  SEM.

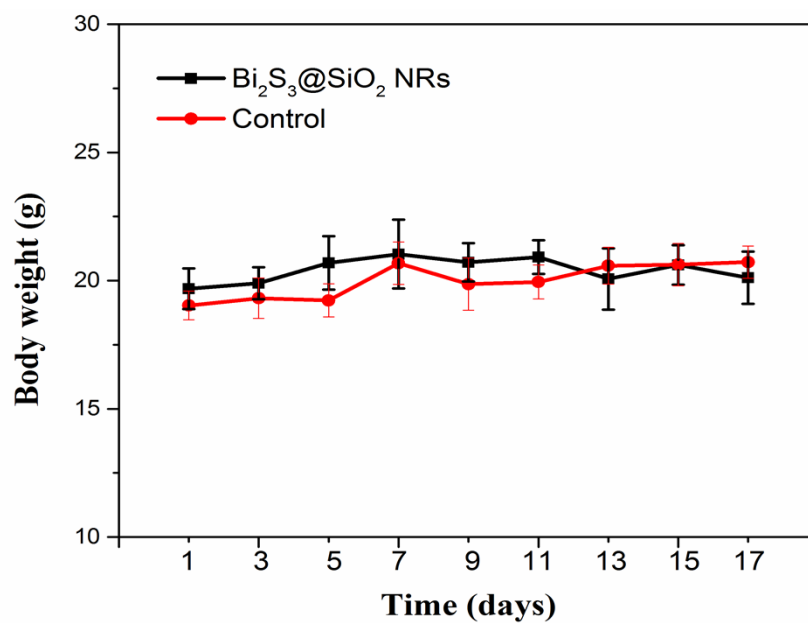

**Figure S11.** BALB/c mice were used to test the *in vivo* toxicity of Bi<sub>2</sub>S<sub>3</sub>@SiO<sub>2</sub> NRs. The 300  $\mu$ L of Bi<sub>2</sub>S<sub>3</sub>@SiO<sub>2</sub> NRs (10 mg/mL) which dispersed in physiological saline were orally delivered to mice (the number of mice in each group is 3) and the weights of mice are recorded at several time-points. The control group was received same volume of physiological saline in the same way.

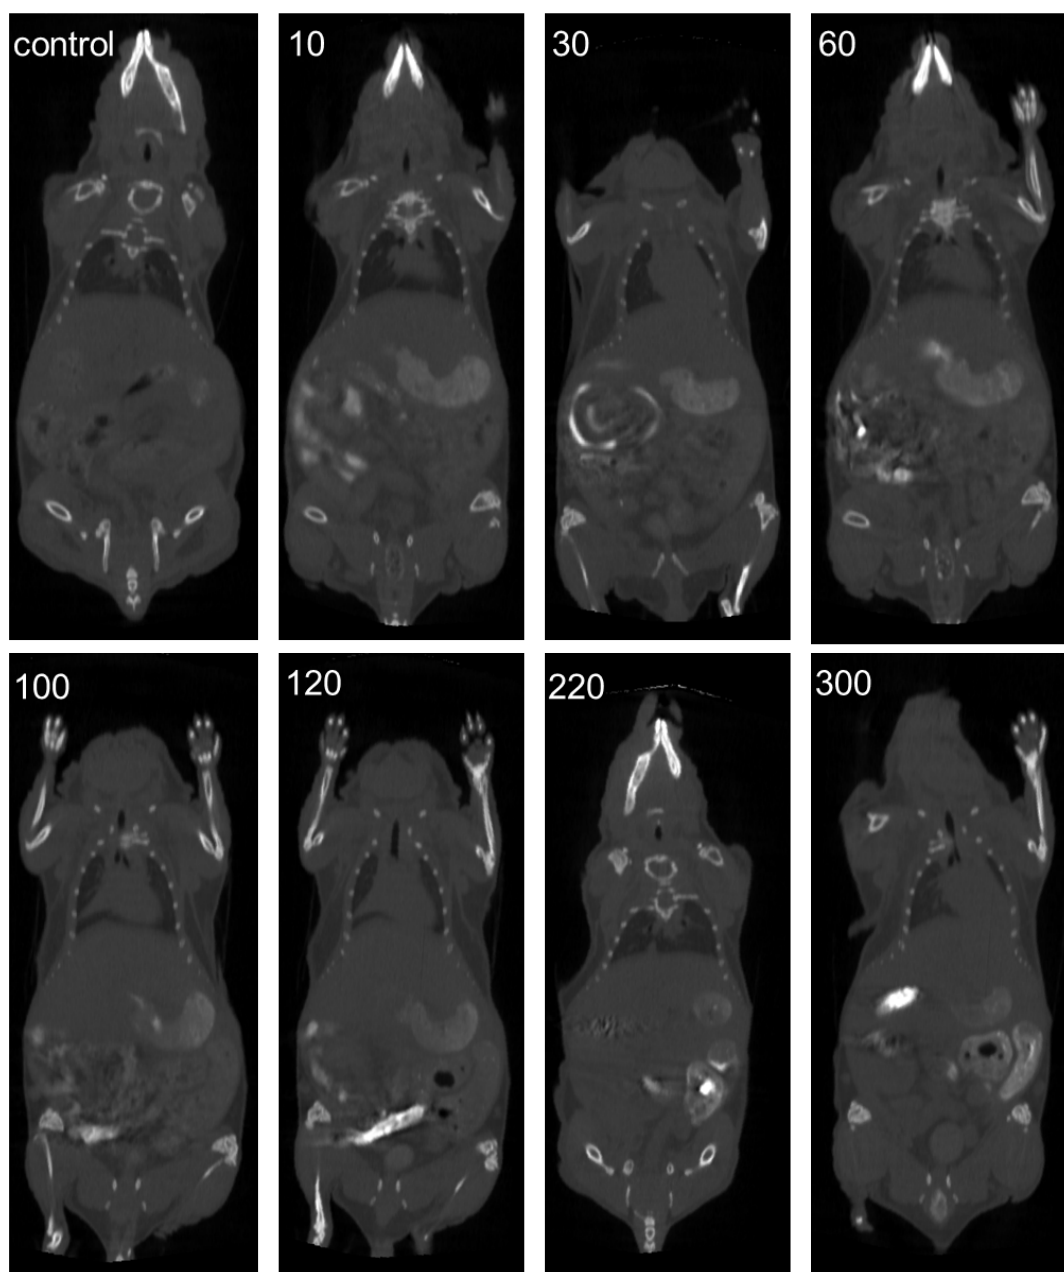

**Figure S12.** *In vivo* CT coronal views of intestine in BALB/c nude mice at different intervals after oral administration of Bi<sub>2</sub>S<sub>3</sub>@SiO<sub>2</sub> NRs.

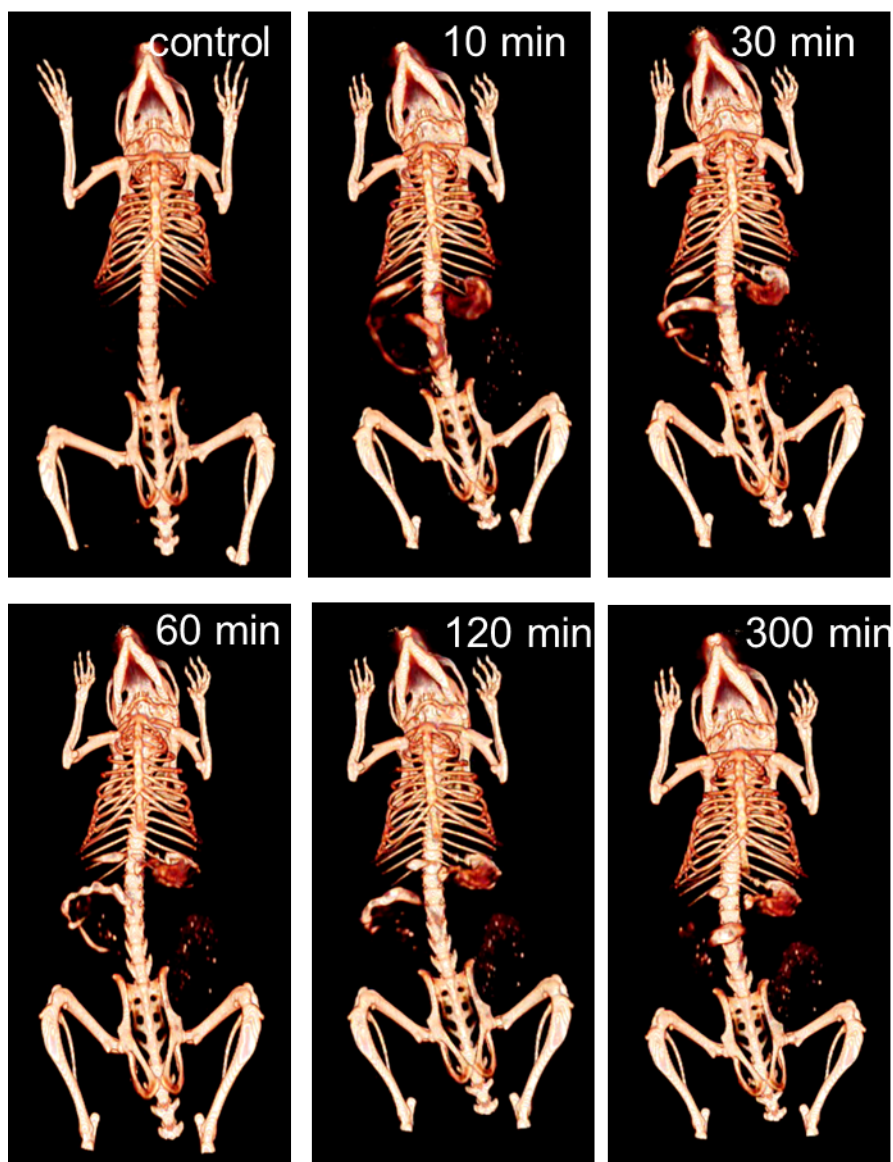

**Figure S13.** *In vivo* CT imaging of GI tract in BALB/c nude mice at different intervals after oral administration of barium sulfate dispersion.
